# Supplementary material
Source: Elsevier journal article supplement (https://www.sciencedirect.com/science/article/pii/S2530064421000298)
Supplement: mmc1 [file S2530064421000298:mmc1.docx]

**Table S1.** Summary of models constructed for bat roadkill on roads in the Brazilian Federal District from April 2010 to March 2015. For each model, we present the number degrees of freedom (df), Akaike Information Criterion corrected for small samples (AICc), AICc differences (∆AICc), and adjusted R². Models with ∆AICc < 2 were used in multimodel inference.

| **Model** | **df** | **AICc** | **∆AICc** | **Adjusted R²** |
| --- | --- | --- | --- | --- |
| Season + Type + Distance to Water | 7 | 182.07 | 0.000 | 0.740 |
| Season + Type | 6 | 183.66 | 1.594 | 0.597 |
| Season + Type + Distance to Water + Light | 8 | 184.45 | 2.384 | 0.642 |
| Season + Type + Light | 7 | 185.73 | 3.661 | 0.690 |
| Type + Distance to Water | 6 | 188.89 | 6.821 | 0.606 |
| Type + | 5 | 190.18 | 8.111 | 0.626 |
| Type + Distance to Water + Light | 7 | 191.20 | 9.138 | 0.740 |
| Type + Light | 6 | 192.17 | 10.102 | 0.727 |
| Season + Distance to Water + Light | 7 | 197.40 | 15.333 | 0.727 |
| Season + Light | 6 | 198.91 | 16.842 | 0.684 |
| Season + | 5 | 202.89 | 20.822 | 0.650 |
| Season + Distance to Water | 6 | 203.37 | 21.310 | 0.669 |
| Distance to Water + Light | 6 | 204.04 | 21.979 | 0.703 |
| Light | 5 | 205.36 | 23.292 | 0.703 |
| Null ¹ | 4 | 209.32 | 27.259 | 0.691 |
| Distance to Water | 5 | 209.88 | 27.814 | 0.642 |

Type – Road Type; Light – Light Presence; ¹ In the null model the response variables are modeled only in function of the random effect, which is the same for all models (1|SectionID/RoadID).
